# Supplementary material for: A novel portable immuno-device for the recognition of lymphatic vessel endothelial hyaluronan receptor-1 biomarker using GQD–AgNPrs conductive ink stabilized on the surface of cellulose
Source: Royal Society of Chemistry journal article supplement (doi:10.1039/d3ra06025j), 2023-01-01
Supplement: d3ra06025j1.pdf [file d3ra06025j1.pdf]

## Supplementary data

**A novel portable immuno-device for the recognition of Lymphatic vessel endothelial hyaluronan receptor-1 biomarker using GQD-AgNPrs conductive ink stabilized on the surface of cellulose**

Ahmad Mobed <sup>abc</sup>, Fereshteh Kohansal <sup>d</sup>, Sanam Dolati <sup>c\*</sup>, Mohammad Hasanzadeh <sup>a,d,\*\*</sup>

<sup>a</sup> Pharmaceutical Analysis Research Center, Tabriz University of Medical Sciences, Tabriz, Iran.

<sup>b</sup> Aging Research Institute, Faculty of Medicine, Tabriz University of Medical Sciences, Iran

<sup>c</sup> Physical Medicine and Rehabilitation Research Center, Aging Research Institute, Faculty of Medicine, Tabriz University of Medical Sciences, Iran

<sup>d</sup> Nutrition Research Center, Tabriz University of Medical Sciences, Tabriz, Iran.

### Corresponding authors

\* Aging Research Institute, Faculty of Medicine, Tabriz University of Medical Sciences, Iran  
[sanam.dolati@gmail.com](mailto:sanam.dolati@gmail.com)

\*\* Pharmaceutical Analysis Research Center, Tabriz University of Medical Sciences, Tabriz 51664, Iran. [hasanzadehm@tbzmed.ac.ir](mailto:hasanzadehm@tbzmed.ac.ir)

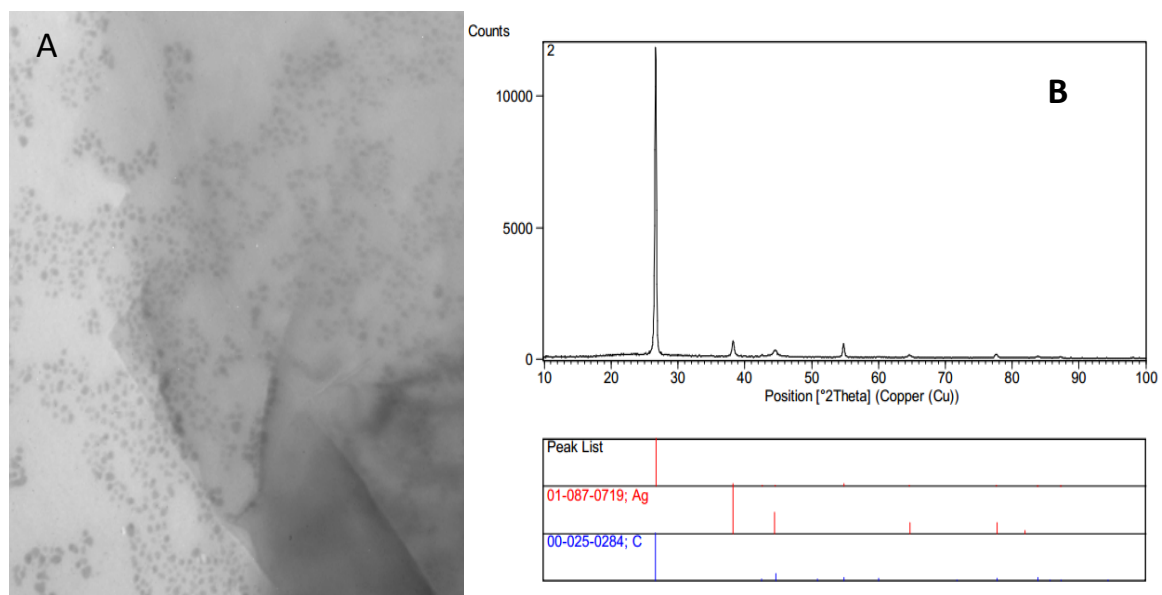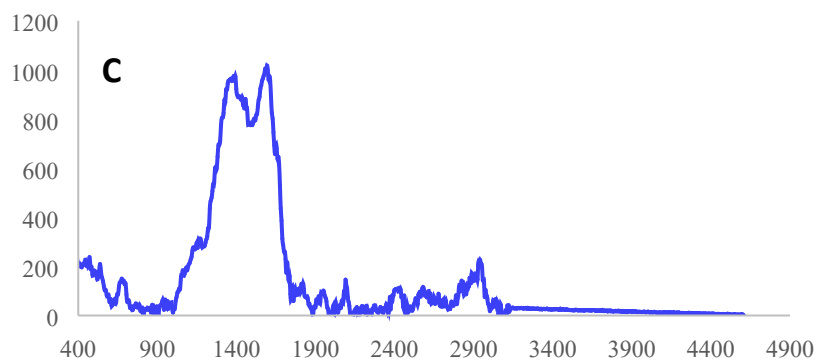

**Fig. S1:** **A)** TEM images of Ag/GQDs nano-ink in different magnification. **B and C)** XRD and Raman Spectra of Ag/GQDs nano-ink.

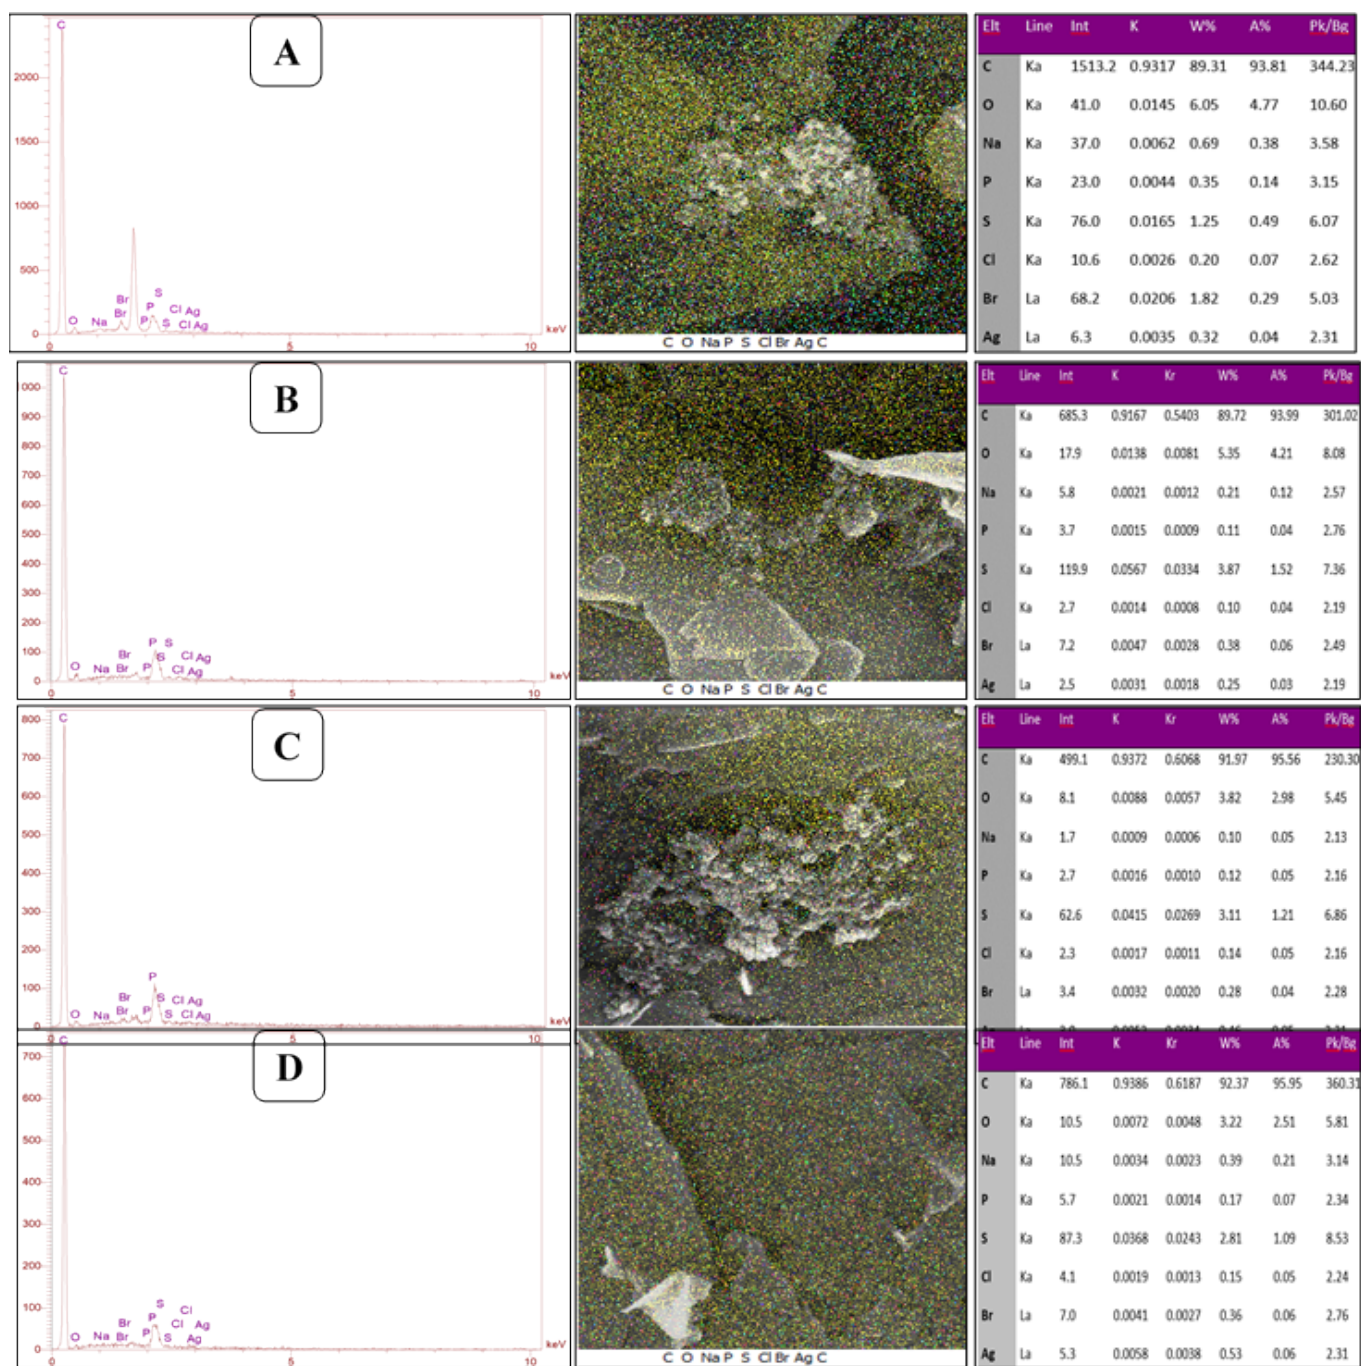

**Fig.S2.** EDS and map-analysis of (A) AgNPrs-GQD nano-ink (B) AgNPrs-GQD nano-ink-Ab, and (C) AgNPrs-GQD nano-ink -Ab-BSA, (D) AgNPrs-GQD nano-ink -Ab-BSA-Ag.

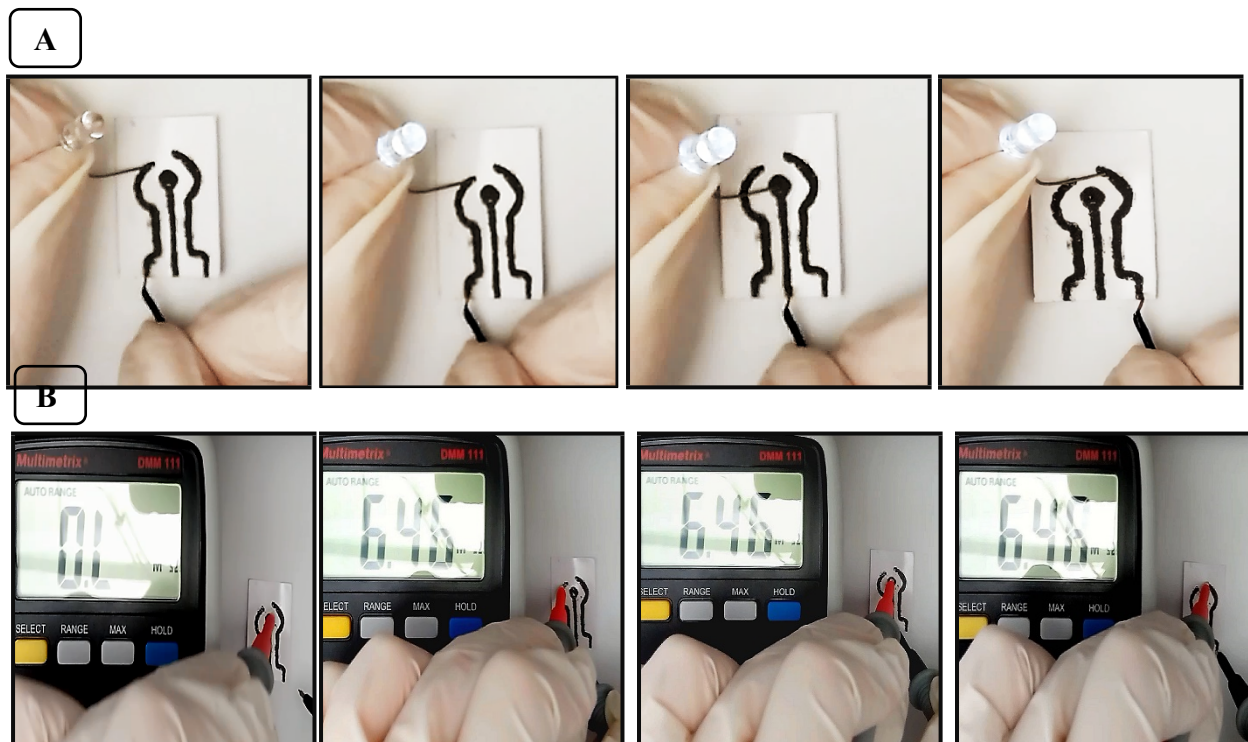

**Fig.S3.** Photographic images of diverse conductive tracks drawn using AgNPrs-GQDs nano-ink. **A)** Establishing electrical connections between 3-volt battery and a LED lamp connected to designated surface coated with AgNPrs-GQD nano-ink. **B)** Examining the resistance of a photographic paper surface coated with AgNPrs-GQD nano-ink.

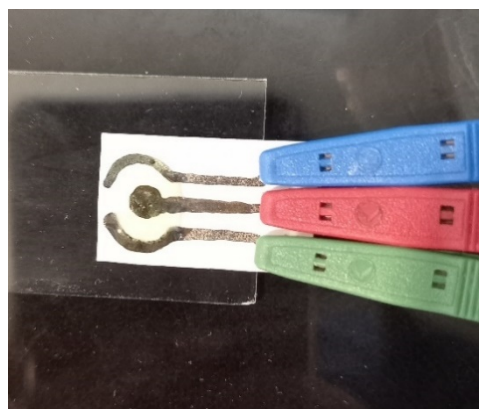

**Fig. S4.** Photographic image of three electrodes paper-based sensor prepared by direct writing of conductive nano-ink.

**Fig. S5.** **A)** DPV's of three similar types of immunosensor prepared in the same condition. **B)** Histograms of peak current *versus* types/number of biosensor. Supporting electrolyte is  $\text{K}_4\text{Fe}(\text{CN})_6/\text{K}_3\text{Fe}(\text{CN})_6/\text{KCl}$ .

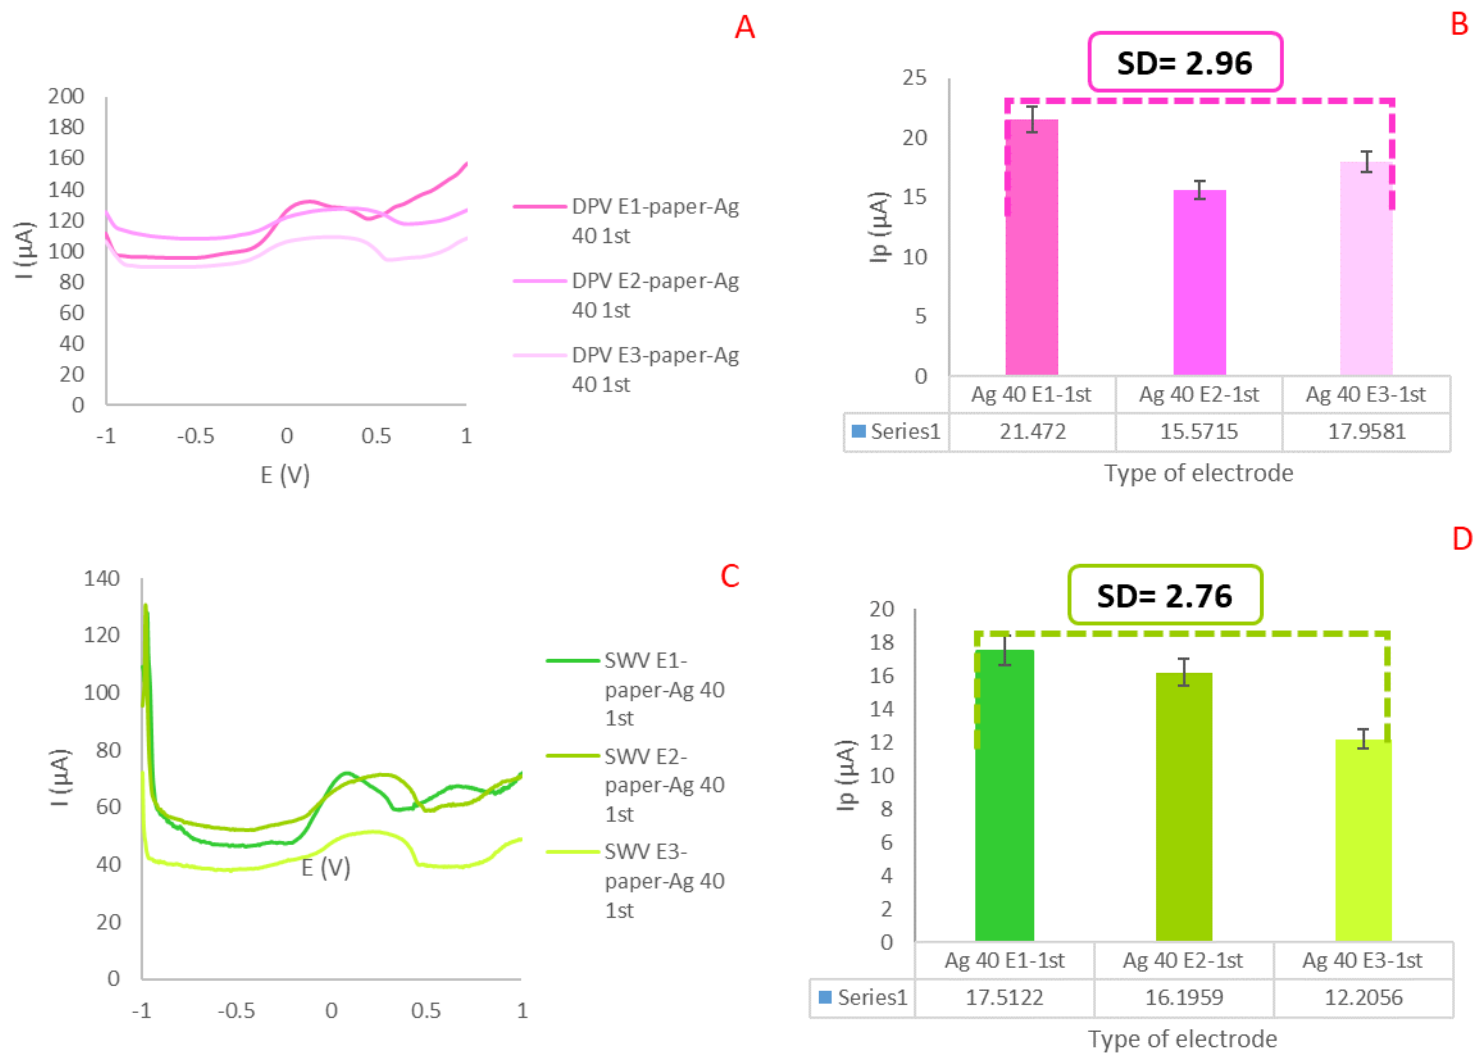

**Fig. S6.** **A)** SWV's of three types of immunosensor in the presence of some concentrations of LYVE-1 (40 pg.ml) for inter-electrode reproducibility test. **B)** Histograms of peak current versus the types/number of biosensor. Supporting electrolyte was  $K_4Fe(CN)_6/K_3Fe(CN)_6/KCl$ .

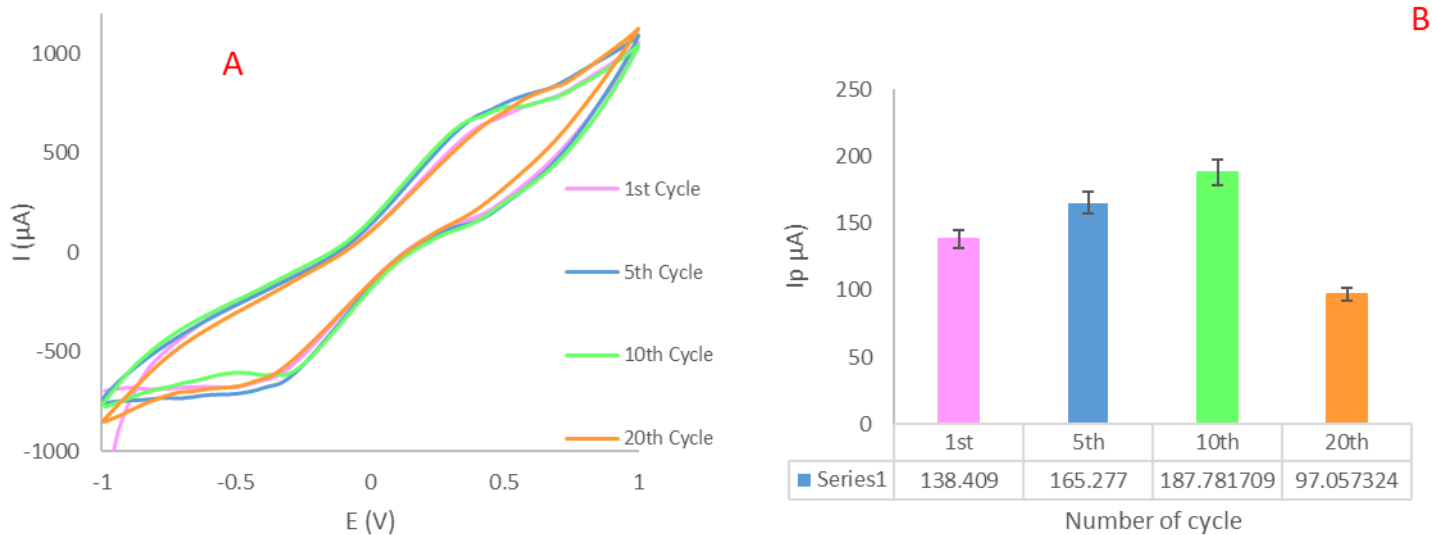

**Fig.S7. A)** CVs of AgNPrs/GQD nano-ink stabilized on the surface of paper in different cycles (1<sup>st</sup>, 5<sup>th</sup>, 10<sup>th</sup> and 20<sup>th</sup> cycles). **B)** Histograms of peak current *versus* number of cycles.

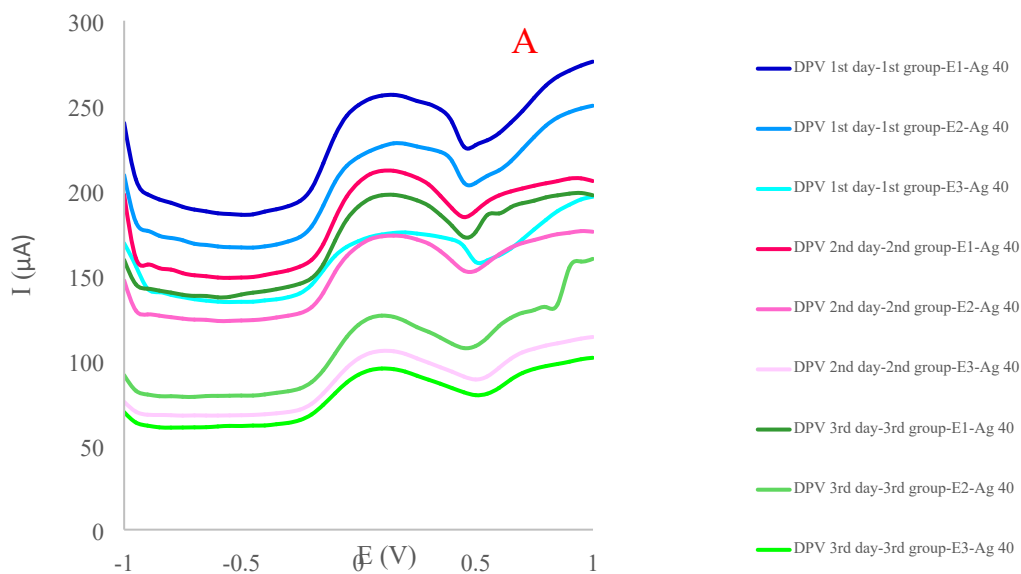

**Fig.S8. A)** DPV's of AgNPrs-GQDs nano ink/ Biotin-Ab/BSA/Ag (20 pg.ml) modified paper-based three

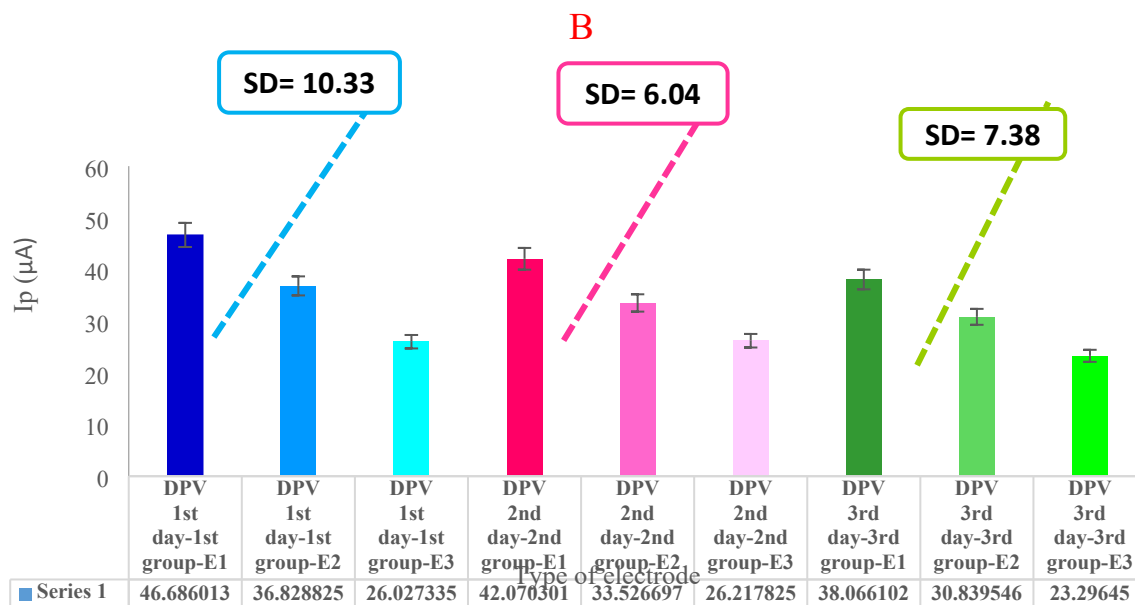

electrodes with same concentration of Ag for study of repeatability in three days. **B)** Histograms of peak current versus the types of modified electrodes. Supporting electrolyte was  $K_4Fe(CN)_6/K_3Fe(CN)_6/KCl$ . (RSD for  $E_1=0.28$ ,  $E_2=0.178$ ,  $E_3=0.2$ ).

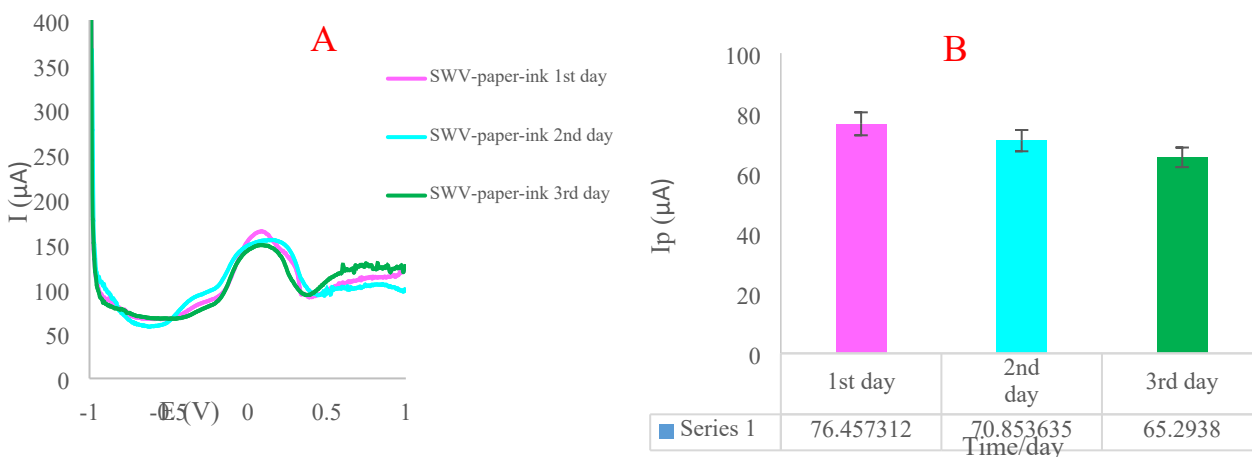

**Fig.S9. A)** SWVs of AgNPrs-GQDs modified photographic paper for investigation of inter-day stability of immunosensor substrate, in three days. **B)** Histograms of peak current *versus* three days of incubation.



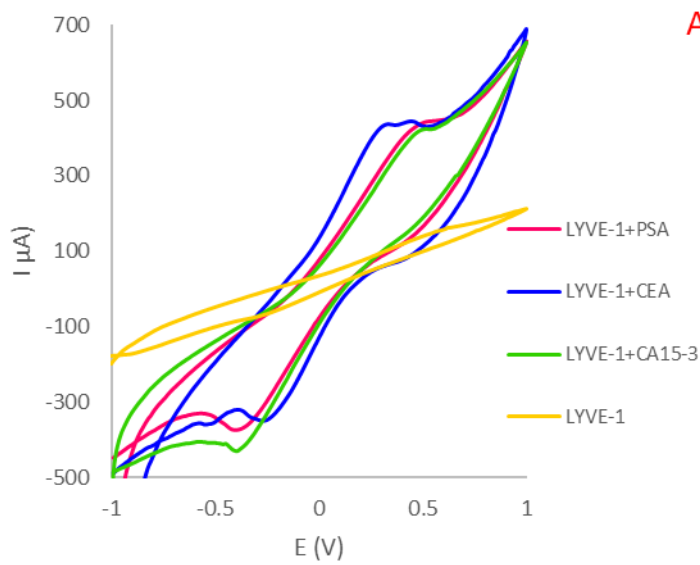

A

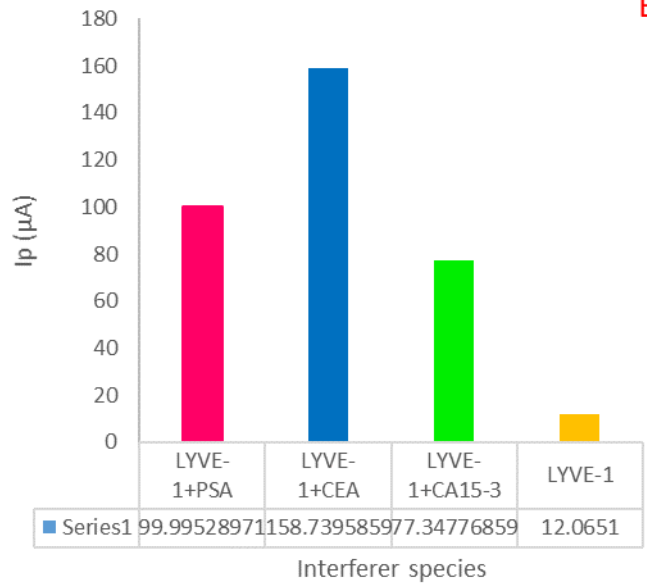

B

**Fig.S10. A)** CVs of immunosensor tested for the detection of LYVE-1, in the presence of interferer species (PSA, CEA, CA15-3). **B)** Histograms of peak current *versus* type interferer species.
